# Supplementary material
Source: PubMed Central journal article supplement (PMC7706202)
Supplement: 12877_2020_1921_MOESM2_ESM.pdf [file 12877_2020_1921_MOESM2_ESM.pdf]

the Supplementary File for reviewer#1

Table 1qSOFA score in the Discharged andDeath Groups

| qSOFA score | Total(n=141) | Discharged(n=123) | Death(n=18) |
|-------------|--------------|-------------------|-------------|
| 0           | 92(65.2)     | 88(71.5)          | 4(22.2)     |
| 1           | 39(27.7)     | 32(26.0)          | 7(38.9)     |
| 2           | 9(6.4)       | 3(2.4)            | 6(33.3)     |
| 3           | 1(0.7)       | 0(0.0)            | 1(5.6)      |

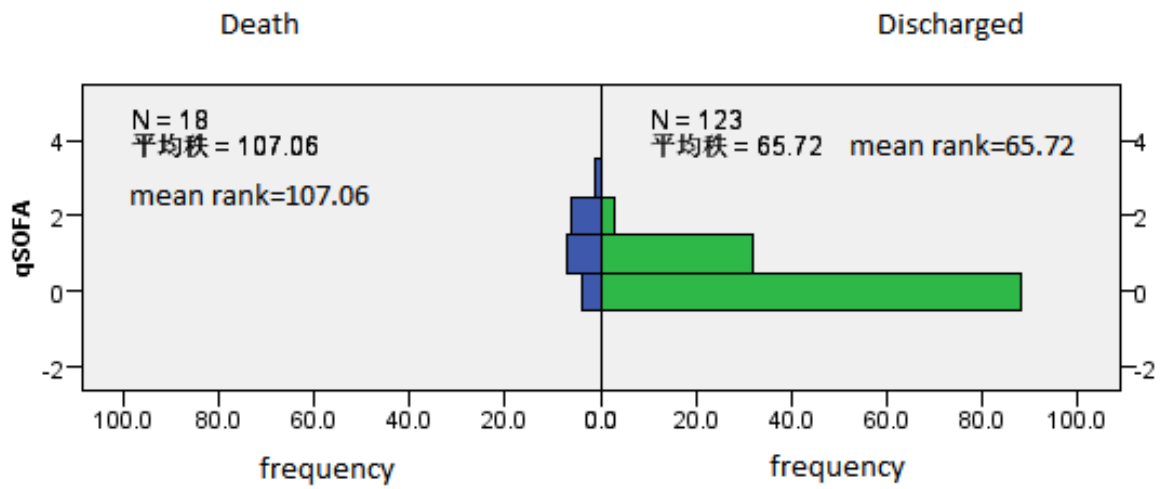

Figure 1 Mann Whitney U Test of qSOFA in the Discharged and Death Groups

|                                      |           |
|--------------------------------------|-----------|
| Total N                              | 141       |
| Mann Whitney U                       | 458.000   |
| Wilcoxon W                           | 8,084.000 |
| Test statistics                      | 458.000   |
| Standard error                       | 135.503   |
| Progressive significance (two sides) | .000      |

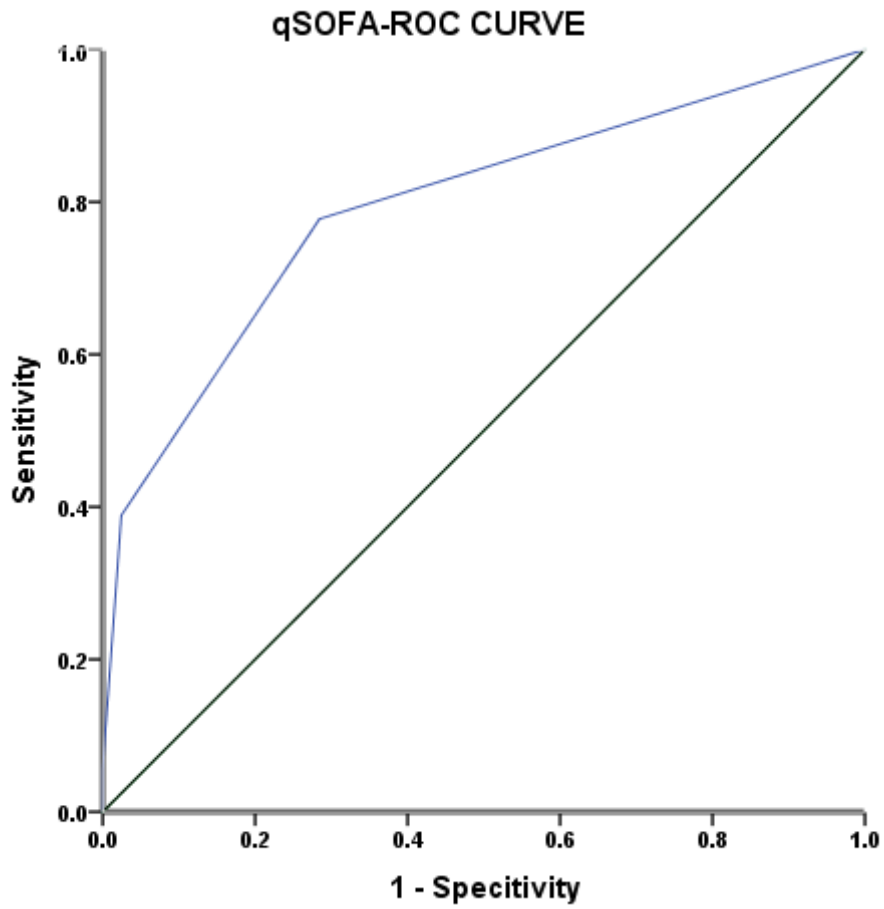

**Figure 2 ROC Curve of qSOFA Score**

| <b>AUC</b>   | <b>Standard error</b> | <b>Progressive significance</b> | <b>95%CI</b>         |
|--------------|-----------------------|---------------------------------|----------------------|
| <b>0.793</b> | <b>0.065</b>          | <b>0.000</b>                    | <b>(0.667-0.920)</b> |

| <b>qSOFAScore <math>\geq</math></b> | <b>Sensitivity</b> | <b>1-Specificity</b> |
|-------------------------------------|--------------------|----------------------|
| <b>0.50</b>                         | <b>0.778</b>       | <b>0.285</b>         |
| <b>1.50</b>                         | <b>0.389</b>       | <b>0.024</b>         |
| <b>2.50</b>                         | <b>0.056</b>       | <b>0.000</b>         |
| <b>4.00</b>                         | <b>0.000</b>       | <b>0.000</b>         |
